# Supplementary material for: Socioeconomic Status and the Gut Microbiome: A TwinsUK Cohort Study
Source: MDPI journal article supplement (doi:10.3390/microorganisms7010017), 2019-01-11
Supplement: s1 [file s1]

# SES & the microbiome 3.1: Beta Diversity & Permanova

December 04, 2018

```
library(phyloseq)
library(data.table)
library(ggplot2)
library(ape)

otus <- read.table("Variance_transformed_SEStrimmed5%OTU_table.txt",
  sep = " ", row.names = 1, header = T)
tree <- read.tree("microbiome_tables/phyloseq_tables_aug2017/reduced_tree.tre")
tax <- read.csv("taxa_SES_trimmed5%.csv", row.names = 1)
mapping <- read.csv("mapping_ses_correctpcdes041218.csv")
mapping$IMD5f <- as.factor(mapping$IMD5f)
mapping$eduff <- as.factor(mapping$eduff)
mapping$Income4F <- as.factor(mapping$Income4F)
mapping$FIsqrt <- sqrt(mapping$FI)

OTU <- otu_table(otus, taxa_are_rows = T)
tax <- as.matrix(tax)
TAX <- tax_table(tax)
physeq <- phyloseq(OTU, TAX)

mapping <- sample_data(mapping)
row.names(mapping) <- mapping$SequencingSpecificName

physeq1 <- merge_phyloseq(physeq, mapping, tree)
```

## IMD - Bray

```
require(vegan)
metadata <- as(sample_data(physeq1), "data.frame")

metadata1 <- metadata[complete.cases(metadata$FIsqrt, metadata$Age,
  metadata$HEI, metadata$BMI), ]

map <- sample_data(physeq1)
bray <- vegdist(t(otus), "bray")
bray <- as.dist(as(bray, "matrix"))
Ord.bray <- ordinate(physeq1, method = "MDS", distance = bray)

braym <- as.matrix(bray)
braym <- as.data.frame(braym)
bray1 <- braym[which(row.names(braym) %in% metadata1$SequencingSpecificName),
  ]
bray1 <- bray1[, which(names(bray1) %in% metadata1$SequencingSpecificName)]
bray1 <- as.dist(as(bray1, "matrix"))

set.seed(1)
```

```
adonis(bray1 ~ IMD5f, data = metadata1, permutations = 5000)
```

```
##
## Call:
## adonis(formula = bray1 ~ IMD5f, data = metadata1, permutations = 5000)
##
## Permutation: free
## Number of permutations: 5000
##
## Terms added sequentially (first to last)
##
##           Df SumsOfSqs  MeanSqs F.Model    R2  Pr(>F)
## IMD5f      4      0.174 0.043505  1.3729 0.00328 0.008398 **
## Residuals 1667     52.823 0.031687      0.99672
## Total     1671     52.997      1.00000
## ---
## Signif. codes:  0 '***' 0.001 '**' 0.01 '*' 0.05 '.' 0.1 ' ' 1
```

```
adonis(bray1 ~ IMD5f + FI + Age + BMI + HEI + Library_sizelog10,
       data = metadata1, permutations = 5000)
```

```
##
## Call:
## adonis(formula = bray1 ~ IMD5f + FI + Age + BMI + HEI + Library_sizelog10, data = metadata1, permutations = 5000)
##
## Permutation: free
## Number of permutations: 5000
##
## Terms added sequentially (first to last)
##
##           Df SumsOfSqs MeanSqs F.Model    R2  Pr(>F)
## IMD5f      4      0.174 0.04351  1.4051 0.00328 0.005999 **
## FI         1      0.273 0.27258  8.8035 0.00514 0.000200 ***
## Age        1      0.207 0.20742  6.6991 0.00391 0.000200 ***
## BMI        1      0.226 0.22592  7.2966 0.00426 0.000200 ***
## HEI        1      0.142 0.14222  4.5933 0.00268 0.000200 ***
## Library_sizelog10 1      0.515 0.51461 16.6204 0.00971 0.000200 ***
## Residuals  1662     51.460 0.03096      0.97100
## Total     1671     52.997      1.00000
## ---
## Signif. codes:  0 '***' 0.001 '**' 0.01 '*' 0.05 '.' 0.1 ' ' 1
```

## Dispersion

```
beta <- betadisper(bray1, metadata1$IMD5f)
permutest(beta)
```

```
##
## Permutation test for homogeneity of multivariate dispersions
## Permutation: free
## Number of permutations: 999
##
## Response: Distances
```

| ##           | Df   | Sum Sq  | Mean Sq    | F      | N.Perm | Pr(>F) |
|--------------|------|---------|------------|--------|--------|--------|
| ## Groups    | 4    | 0.00174 | 0.00043520 | 0.5667 | 999    | 0.664  |
| ## Residuals | 1667 | 1.28027 | 0.00076801 |        |        |        |

## IMD - W. Unifrac

```

metadata1 <- metadata[complete.cases(metadata$FIsqrt, metadata$Age,
  metadata$HEI, metadata$BMI), ]

w.unifrac <- read.table("distance_matrixes/weigthed_unifrac_phyloseq_rooted_tree.txt")

wum <- as.matrix(w.unifrac)
wum <- as.data.frame(wum)
wum1 <- wum[which(row.names(wum) %in% metadata1$SequencingSpecificName),
]
wum1 <- wum1[, which(names(wum1) %in% metadata1$SequencingSpecificName)]
wum1 <- as.dist(as(wum1, "matrix"))

adonis(wum1 ~ IMD5f, data = metadata1, permutations = 5000)

```

```

##
## Call:
## adonis(formula = wum1 ~ IMD5f, data = metadata1, permutations = 5000)
##
## Permutation: free
## Number of permutations: 5000
##
## Terms added sequentially (first to last)
##
##              Df SumsOfSqs MeanSqs F.Model      R2 Pr(>F)
## IMD5f          4    0.0593 0.014836  1.3494 0.00323 0.03139 *
## Residuals 1667   18.3288 0.010995           0.99677
## Total       1671   18.3882           1.00000
## ---
## Signif. codes:  0 '***' 0.001 '**' 0.01 '*' 0.05 '.' 0.1 ' ' 1

full.wum.IMD.adonis <- adonis(wum1 ~ IMD5f + FI + Age + BMI +
  HEI + Library_size$log10, data = metadata1, permutations = 5000)
full.wum.IMD.adonis

```

```

##
## Call:
## adonis(formula = wum1 ~ IMD5f + FI + Age + BMI + HEI + Library_size$log10, data = metadata1, permutations = 5000)
##
## Permutation: free
## Number of permutations: 5000
##
## Terms added sequentially (first to last)
##
##              Df SumsOfSqs MeanSqs F.Model      R2 Pr(>F)
## IMD5f          4    0.0593 0.014836  1.3788 0.00323 0.0232 *
## FI              1    0.1142 0.114238 10.6165 0.00621 0.0002 ***
## Age             1    0.0950 0.094979  8.8267 0.00517 0.0002 ***
## BMI             1    0.0925 0.092469  8.5935 0.00503 0.0002 ***
## HEI             1    0.0456 0.045648  4.2422 0.00248 0.0002 ***
## Library_size$log10 1    0.0977 0.097719  9.0814 0.00531 0.0002 ***
## Residuals      1662   17.8838 0.010760           0.97257
## Total          1671   18.3882           1.00000

```

```
## ---
## Signif. codes:  0 '***' 0.001 '**' 0.01 '*' 0.05 '.' 0.1 ' ' 1
```

## Dispersion

```
beta <- betadisper(wum1, metadata1$IMD5f)
permutest(beta)
```

```
##
## Permutation test for homogeneity of multivariate dispersions
## Permutation: free
## Number of permutations: 999
##
## Response: Distances
##      Df Sum Sq   Mean Sq      F N.Perm Pr(>F)
## Groups    4 0.00066 0.00016396 0.4928   999  0.761
## Residuals 1667 0.55465 0.00033272
```

## Education - Bray

```
metadata2 <- metadata[complete.cases(metadata$FIsqrt, metadata$Age,
  metadata$HEI, metadata$BMI, metadata$eduff), ]

bray2 <- braym[which(row.names(braym) %in% metadata2$SequencingSpecificName),
  ]
bray2 <- bray2[, which(names(bray2) %in% metadata2$SequencingSpecificName)]
bray2 <- as.dist(as(bray2, "matrix"))

a1.eduff <- adonis(bray2 ~ eduff, data = metadata2, permutations = 5000)
a1.eduff

##
## Call:
## adonis(formula = bray2 ~ eduff, data = metadata2, permutations = 5000)
##
## Permutation: free
## Number of permutations: 5000
##
## Terms added sequentially (first to last)
##
##              Df SumsOfSqs  MeanSqs F.Model    R2    Pr(>F)
## eduff          3      0.162 0.054114  1.7143 0.0036 0.0003999 ***
## Residuals 1422    44.887 0.031566          0.9964
## Total      1425    45.049          1.0000
## ---
## Signif. codes:  0 '***' 0.001 '**' 0.01 '*' 0.05 '.' 0.1 ' ' 1

full.bray.eduff.adonis <- adonis(bray2 ~ eduff + FI + Age + BMI +
  HEI + Library_size$log10, data = metadata2, permutations = 5000)
```

## Dispersion

```
beta <- betadisper(bray2, metadata2$eduff)
permutest(beta)

##
## Permutation test for homogeneity of multivariate dispersions
## Permutation: free
## Number of permutations: 999
##
## Response: Distances
##              Df Sum Sq    Mean Sq    F N.Perm Pr(>F)
## Groups        3 0.00238 0.00079308 1.0196    999  0.42
## Residuals 1422 1.10606 0.00077782
```

## Education - W. unifracs

```

metadata2 <- metadata[complete.cases(metadata$FIsqrt, metadata$Age,
  metadata$HEI, metadata$BMI, metadata$eduff), ]

wum2 <- wum[which(row.names(wum) %in% metadata2$SequencingSpecificName),
]
wum2 <- wum2[, which(names(wum2) %in% metadata2$SequencingSpecificName)]
wum2 <- as.dist(as(wum2, "matrix"))

a1.eduff <- adonis(wum2 ~ eduff, data = metadata2, permutations = 5000)
a1.eduff

```

```

##
## Call:
## adonis(formula = wum2 ~ eduff, data = metadata2, permutations = 5000)
##
## Permutation: free
## Number of permutations: 5000
##
## Terms added sequentially (first to last)
##
##              Df SumsOfSqs  MeanSqs F.Model      R2 Pr(>F)
## eduff          3      0.057 0.018994  1.7388 0.00365 0.0022 **
## Residuals 1422     15.534 0.010924           0.99635
## Total       1425     15.591           1.00000
## ---
## Signif. codes:  0 '***' 0.001 '**' 0.01 '*' 0.05 '.' 0.1 ' ' 1

```

```

full.wum.eduff.adonis <- adonis(wum2 ~ eduff + FI + Age + BMI +
  HEI + Library_sizelog10, data = metadata2, permutations = 5000)

```

```

full.wum.eduff.adonis

```

```

##
## Call:
## adonis(formula = wum2 ~ eduff + FI + Age + BMI + HEI + Library_sizelog10, data = metadata2, permutations = 5000)
##
## Permutation: free
## Number of permutations: 5000
##
## Terms added sequentially (first to last)
##
##              Df SumsOfSqs  MeanSqs F.Model      R2  Pr(>F)
## eduff          3      0.0570 0.018994  1.7729 0.00365 0.002799 **
## FI              1      0.1072 0.107243 10.0098 0.00688 0.000200 ***
## Age             1      0.0634 0.063370  5.9148 0.00406 0.000200 ***
## BMI             1      0.0654 0.065376  6.1020 0.00419 0.000200 ***
## HEI             1      0.0390 0.038951  3.6356 0.00250 0.000200 ***
## Library_sizelog10 1      0.0771 0.077140  7.2001 0.00495 0.000200 ***
## Residuals      1417     15.1814 0.010714           0.97376
## Total          1425     15.5905           1.00000
## ---
## Signif. codes:  0 '***' 0.001 '**' 0.01 '*' 0.05 '.' 0.1 ' ' 1

```

## Dispersion

```
beta <- betadisper(wum2, metadata2$eduff)
permutest(beta)
```

```
##
## Permutation test for homogeneity of multivariate dispersions
## Permutation: free
## Number of permutations: 999
##
## Response: Distances
##           Df Sum Sq   Mean Sq    F N.Perm Pr(>F)
## Groups      3 0.00074 0.00024600 0.7324   999  0.532
## Residuals 1422 0.47761 0.00033587
```



## Income - Bray

```
metadata3 <- metadata[complete.cases(metadata$FIsqrt, metadata$Age,
  metadata$HEI, metadata$BMI, metadata$Income4F), ]

bray3 <- braym[which(row.names(braym) %in% metadata3$SequencingSpecificName),
]
bray3 <- bray3[, which(names(bray3) %in% metadata3$SequencingSpecificName)]
bray3 <- as.dist(as(bray3, "matrix"))

adonis(bray3 ~ Income4F, data = metadata3, permutations = 5000)
```

```
##
## Call:
## adonis(formula = bray3 ~ Income4F, data = metadata3, permutations = 5000)
##
## Permutation: free
## Number of permutations: 5000
##
## Terms added sequentially (first to last)
##
##           Df SumsOfSqs MeanSqs F.Model      R2 Pr(>F)
## Income4F   3    0.1163 0.038767  1.2188 0.00458 0.06639 .
## Residuals 795    25.2872 0.031808          0.99542
## Total      798    25.4035          1.00000
## ---
## Signif. codes:  0 '***' 0.001 '**' 0.01 '*' 0.05 '.' 0.1 ' ' 1

full.bray.Income.adonis <- adonis(bray3 ~ Income4F + FI + Age +
  BMI + HEI + Library_sizelog10, data = metadata3, permutations = 5000)
full.bray.Income.adonis
```

```
##
## Call:
## adonis(formula = bray3 ~ Income4F + FI + Age + BMI + HEI + Library_sizelog10,      data = metadata3, permuta
##
## Permutation: free
## Number of permutations: 5000
##
## Terms added sequentially (first to last)
##
##           Df SumsOfSqs MeanSqs F.Model      R2      Pr(>F)
## Income4F   3    0.1163 0.038767  1.2432 0.00458 0.0507898 .
## FI         1    0.1649 0.164939  5.2895 0.00649 0.0002000 ***
## Age        1    0.0805 0.080527  2.5825 0.00317 0.0005999 ***
## BMI        1    0.0933 0.093277  2.9914 0.00367 0.0002000 ***
## HEI        1    0.0682 0.068187  2.1867 0.00268 0.0029994 **
## Library_sizelog10 1    0.2465 0.246498  7.9051 0.00970 0.0002000 ***
## Residuals  790   24.6338 0.031182          0.96970
## Total      798   25.4035          1.00000
## ---
## Signif. codes:  0 '***' 0.001 '**' 0.01 '*' 0.05 '.' 0.1 ' ' 1
```

## Dispersion

```
##
## Permutation test for homogeneity of multivariate dispersions
## Permutation: free
## Number of permutations: 999
##
## Response: Distances
##      Df Sum Sq   Mean Sq    F N.Perm Pr(>F)
## Groups    3 0.00553 0.00184286 2.3465   999 0.094 .
## Residuals 795 0.62437 0.00078537
## ---
## Signif. codes:  0 '***' 0.001 '**' 0.01 '*' 0.05 '.' 0.1 ' ' 1
```

## Income - W. Unifrac

```
metadata3 <- metadata[complete.cases(metadata$FIsqrt, metadata$Age,
  metadata$HEI, metadata$BMI, metadata$Income4F), ]

wum3 <- wum[which(row.names(wum) %in% metadata3$SequencingSpecificName),
]
wum3 <- wum3[, which(names(wum3) %in% metadata3$SequencingSpecificName)]
wum3 <- as.dist(as(wum3, "matrix"))

adonis(wum3 ~ Income4F, data = metadata3, permutations = 5000)
```

```
##
## Call:
## adonis(formula = wum3 ~ Income4F, data = metadata3, permutations = 5000)
##
## Permutation: free
## Number of permutations: 5000
##
## Terms added sequentially (first to last)
##
##           Df SumsOfSqs MeanSqs F.Model      R2 Pr(>F)
## Income4F    3    0.0387 0.012894  1.1736 0.00441 0.1504
## Residuals 795    8.7346 0.010987          0.99559
## Total      798    8.7733          1.00000
```

```
adonis(wum3 ~ Income4F + FI + Age + BMI + HEI + Library_sizelog10,
  data = metadata3, permutations = 5000)
```

```
##
## Call:
## adonis(formula = wum3 ~ Income4F + FI + Age + BMI + HEI + Library_sizelog10, data = metadata3, permutat.
##
## Permutation: free
## Number of permutations: 5000
##
## Terms added sequentially (first to last)
##
##           Df SumsOfSqs MeanSqs F.Model      R2      Pr(>F)
## Income4F    3    0.0387 0.012894  1.1934 0.00441 0.1339732
## FI          1    0.0624 0.062419  5.7771 0.00711 0.0002000 ***
## Age         1    0.0234 0.023428  2.1684 0.00267 0.0073985 **
## BMI         1    0.0353 0.035334  3.2703 0.00403 0.0005999 ***
## HEI         1    0.0227 0.022715  2.1024 0.00259 0.0089982 **
## Library_sizelog10 1    0.0551 0.055124  5.1019 0.00628 0.0002000 ***
## Residuals   790    8.5356 0.010805          0.97291
## Total      798    8.7733          1.00000
## ---
## Signif. codes:  0 '***' 0.001 '**' 0.01 '*' 0.05 '.' 0.1 ' ' 1
```

## Dispersion

```
beta <- betadisper(wum3, metadata3$Income4F)
permutest(beta)

##
## Permutation test for homogeneity of multivariate dispersions
## Permutation: free
## Number of permutations: 999
##
## Response: Distances
##           Df    Sum Sq    Mean Sq      F N.Perm Pr(>F)
## Groups      3 0.002492 0.00083080 2.4162   999 0.065 .
## Residuals 795 0.273361 0.00034385
## ---
## Signif. codes:  0 '***' 0.001 '**' 0.01 '*' 0.05 '.' 0.1 ' ' 1
```

## Packages used

```
citation("phyloseq")
```

```
##
## To cite phyloseq in publications, or otherwise credit, please use:
##
##   phyloseq: An R package for reproducible interactive analysis and
##   graphics of microbiome census data. Paul J. McMurdie and Susan
##   Holmes (2013) PLoS ONE 8(4):e61217.
##
## A BibTeX entry for LaTeX users is
##
##   @Article{,
##     author = {Paul J. McMurdie and Susan Holmes},
##     journal = {PLOS ONE},
##     pages = {e61217},
##     title = {phyloseq: An R package for reproducible interactive analysis and graphics of microbiome census
##     volume = {8},
##     number = {4},
##     year = {2013},
##     url = {http://dx.plos.org/10.1371/journal.pone.0061217},
##   }
```

```
citation("vegan")
```

```
##
## To cite package 'vegan' in publications use:
##
##   Jari Oksanen, F. Guillaume Blanchet, Michael Friendly, Roeland
##   Kindt, Pierre Legendre, Dan McGlinn, Peter R. Minchin, R. B.
##   O'Hara, Gavin L. Simpson, Peter Solymos, M. Henry H. Stevens,
##   Eduard Szoecs and Helene Wagner (2018). vegan: Community Ecology
##   Package. R package version 2.5-2.
##   https://CRAN.R-project.org/package=vegan
##
```

```
## A BibTeX entry for LaTeX users is
##
## @Manual{,
##   title = {vegan: Community Ecology Package},
##   author = {Jari Oksanen and F. Guillaume Blanchet and Michael Friendly and Roeland Kindt and Pierre Legendre},
##   year = {2018},
##   note = {R package version 2.5-2},
##   url = {https://CRAN.R-project.org/package=vegan},
## }
##
## ATTENTION: This citation information has been auto-generated from
## the package DESCRIPTION file and may need manual editing, see
## 'help("citation")'.
```

```
# For creation of Rmarkdown files
citation("rmarkdown")
```

```
##
## To cite package 'rmarkdown' in publications use:
##
## JJ Allaire, Yihui Xie, Jonathan McPherson, Javier Luraschi,
## Kevin Ushey, Aron Atkins, Hadley Wickham, Joe Cheng and Winston
## Chang (2018). rmarkdown: Dynamic Documents for R. R package
## version 1.10. https://CRAN.R-project.org/package=rmarkdown
##
## A BibTeX entry for LaTeX users is
##
## @Manual{,
##   title = {rmarkdown: Dynamic Documents for R},
##   author = {JJ Allaire and Yihui Xie and Jonathan McPherson and Javier Luraschi and Kevin Ushey and Aron Atkins and Hadley Wickham and Joe Cheng and Winston Chang},
##   year = {2018},
##   note = {R package version 1.10},
##   url = {https://CRAN.R-project.org/package=rmarkdown},
## }
```

```
citation("kableExtra")
```

```
##
## To cite package 'kableExtra' in publications use:
##
## Hao Zhu (2018). kableExtra: Construct Complex Table with 'kable'
## and Pipe Syntax. R package version 0.9.0.
## https://CRAN.R-project.org/package=kableExtra
##
## A BibTeX entry for LaTeX users is
##
## @Manual{,
##   title = {kableExtra: Construct Complex Table with 'kable' and Pipe Syntax},
##   author = {Hao Zhu},
##   year = {2018},
##   note = {R package version 0.9.0},
##   url = {https://CRAN.R-project.org/package=kableExtra},
## }
```

```
citation("knitr")
```

```
##
## To cite the 'knitr' package in publications use:
##
##   Yihui Xie (2018). knitr: A General-Purpose Package for Dynamic
##   Report Generation in R. R package version 1.20.
##
##   Yihui Xie (2015) Dynamic Documents with R and knitr. 2nd
##   edition. Chapman and Hall/CRC. ISBN 978-1498716963
##
##   Yihui Xie (2014) knitr: A Comprehensive Tool for Reproducible
##   Research in R. In Victoria Stodden, Friedrich Leisch and Roger
##   D. Peng, editors, Implementing Reproducible Computational
##   Research. Chapman and Hall/CRC. ISBN 978-1466561595
##
## To see these entries in BibTeX format, use 'print(<citation>,
## bibtex=TRUE)', 'toBibtex(.)', or set
## 'options(citation.bibtex.max=999)'.
```
