# Supplementary material for: Socioeconomic Status and the Gut Microbiome: A TwinsUK Cohort Study
Source: MDPI journal article supplement (doi:10.3390/microorganisms7010017), 2019-01-11
Supplement: s1 [file s1]

# SES & the microbiome: 1. Variables + Correlations

*December 04, 2018*

## Socioeconomic variables

### Education

Table 1: Highest education level (self-reported)

|                                                       | n   |
|-------------------------------------------------------|-----|
| No qualification                                      | 210 |
| NVQ1/SVQ1                                             | 35  |
| O-Level/GCSE/NVQ2/SVQ2/Scottish Intermediate          | 336 |
| Scottish higher, NVQ3, city and guilds, Pitman        | 95  |
| A Level, Scottish Advanced Higher                     | 95  |
| Higher Vocational training (e.g. Diploma, NVQ4, SVQ4) | 296 |
| University degree                                     | 252 |
| Postgraduate degree (e.g. Masters or PhD), NVQ5, SVQ5 | 107 |

Table 2: Education - n per factor level

|   | n   |
|---|-----|
| 1 | 245 |
| 2 | 336 |
| 3 | 486 |
| 4 | 359 |

## IMD

Distribution of IMD score (as continuous) in study population

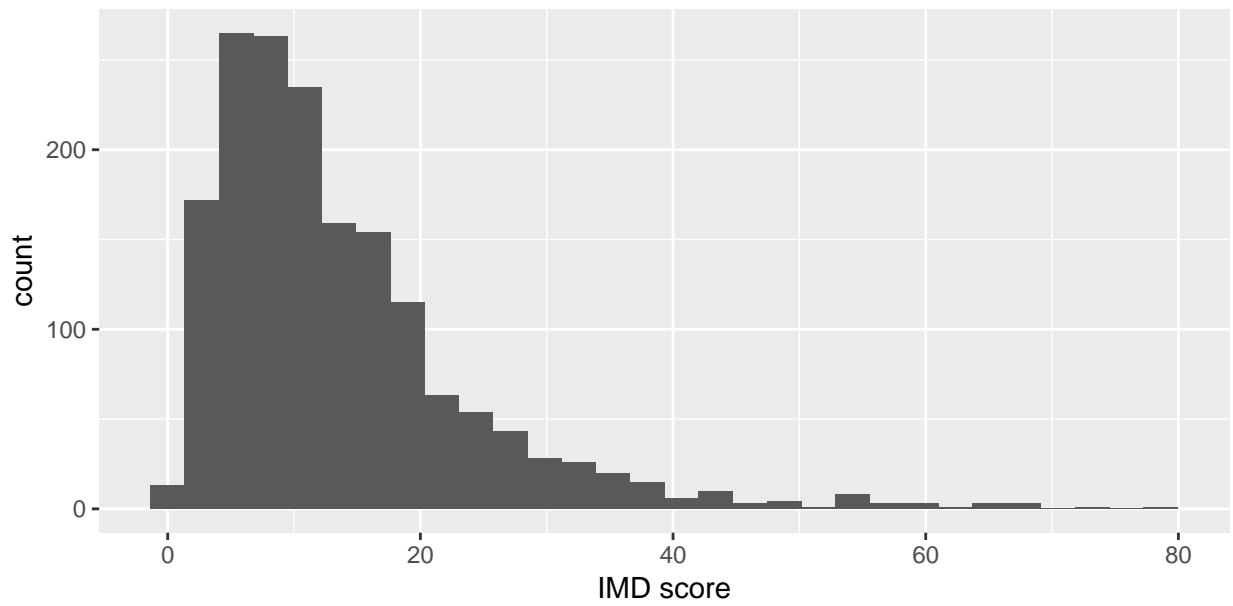

IMD set to quintiles recoded to match direction of other SES variables: 1= most deprived, 5 = least deprived

Table 3: IMD (quintiles) - n

|   | n   |
|---|-----|
| 1 | 336 |
| 2 | 333 |
| 3 | 334 |
| 4 | 334 |
| 5 | 335 |

## Income

Table 4: Income

|                   | n   |
|-------------------|-----|
| < £5000           | 14  |
| £5000 - £9999     | 49  |
| £10,000 - 14,999  | 76  |
| £15,000 - £19,999 | 90  |
| £20,000 - £24,999 | 113 |
| £25,000 - £49,999 | 310 |
| £50,000<          | 147 |

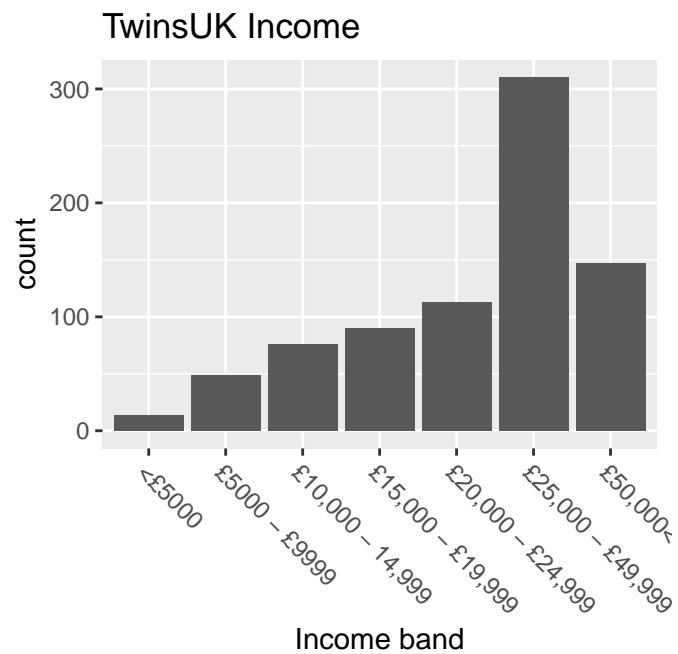

## Income grouped into four factors

Table 5: Income (4 factors)

|                   | n   |
|-------------------|-----|
| < £14,999         | 139 |
| £15,000 - £24,999 | 203 |
| £25,000 - £49,999 | 310 |
| £50,000<          | 147 |

## Metadata

Table 6: Covariates

|     | n    | mean       | sd         | median     | min      | max        |
|-----|------|------------|------------|------------|----------|------------|
| BMI | 1672 | 25.9249703 | 4.7119462  | 25.1690159 | 16.16647 | 47.0782509 |
| Age | 1672 | 61.8881579 | 11.1859878 | 63.0000000 | 19.00000 | 90.0000000 |
| HEI | 1672 | 60.3313397 | 10.0105999 | 60.0000000 | 23.00000 | 93.0000000 |
| FI  | 1672 | 0.1870248  | 0.1244325  | 0.1580645  | 0.00000  | 0.7068965  |

Table 7: Gender

|   | n    |
|---|------|
| F | 1518 |
| M | 154  |

Table 8: Zygosity

|    | n   |
|----|-----|
| DZ | 729 |
| MZ | 943 |

Table 9: Ethnic Origin

|   |         | Freq |
|---|---------|------|
| 2 | Asian   | 7    |
| 3 | Black   | 10   |
| 4 | Chinese | 0    |
| 5 | Mixed   | 9    |
| 6 | Other   | 2    |
| 7 | White   | 1631 |
| 1 | No data | 13   |

## **Correlation of socio-economic factors**

## Correlation of SES factors with covariates

```
ses_microbiome$IMD5f <- as.factor(ses_microbiome$IMD5f)
ses_microbiome$eduff <- as.factor(ses_microbiome$eduff)
ses_microbiome$Income4F <- as.factor(ses_microbiome$Income4F)

toscale <- c("Age", "HEI", "BMI")

ses_microbiome[,which(names(ses_microbiome)%in%toscale)] <- sapply(ses_microbiome[,which(
  scale(x, center=T)
)})

ses_microbiome$FIsqrt <- sqrt(ses_microbiome$FI)

ses_microbiome1 <- ses_microbiome[complete.cases(ses_microbiome$IMD5f),]
```

## IMD quantiles vs Covars

```
IMD.mods <- apply(ses_microbiome1[c("Age", "BMI", "FIsqrt", "HEI")],2, function(x){
  a<- lm(x ~ IMD5f, data=ses_microbiome1)
  b<-summary(a)
  c <- anova(a)
  return(list(b,c))
})
```

IMD.mods

```
## $Age
## $Age[[1]]
##
## Call:
## lm(formula = x ~ IMD5f, data = ses_microbiome1)
##
## Residuals:
##      Min       1Q   Median       3Q      Max
## -3.8947 -0.5100  0.1158  0.6522  2.4715
##
## Coefficients:
##              Estimate Std. Error t value Pr(>|t|)
## (Intercept) -0.13714    0.05433  -2.524 0.011693 *
## IMD5f2       0.09076    0.07701   1.179 0.238757
```

```

## IMD5f3      0.09788      0.07695      1.272 0.203538
## IMD5f4      0.19772      0.07695      2.569 0.010273 *
## IMD5f5      0.29951      0.07689      3.895 0.000102 ***
## ---
## Signif. codes:  0 '***' 0.001 '**' 0.01 '*' 0.05 '.' 0.1 ' ' 1
##
## Residual standard error: 0.9959 on 1667 degrees of freedom
## Multiple R-squared:  0.01054,    Adjusted R-squared:  0.008163
## F-statistic: 4.438 on 4 and 1667 DF,  p-value: 0.001432
##
##
## $Age[[2]]
## Analysis of Variance Table
##
## Response: x
##           Df Sum Sq Mean Sq F value    Pr(>F)
## IMD5f      4   17.61   4.4020   4.4383 0.001432 **
## Residuals 1667 1653.39   0.9918
## ---
## Signif. codes:  0 '***' 0.001 '**' 0.01 '*' 0.05 '.' 0.1 ' ' 1
##
##
## $BMI
## $BMI[[1]]
##
## Call:
## lm(formula = x ~ IMD5f, data = ses_microbiome1)
##
## Residuals:
##      Min       1Q   Median       3Q      Max
## -1.9888 -0.6969 -0.1305  0.5137  4.6056
##
## Coefficients:
##              Estimate Std. Error t value Pr(>|t|)
## (Intercept)  0.20672     0.05420   3.814 0.000142 ***
## IMD5f2      -0.29283     0.07682  -3.812 0.000143 ***
## IMD5f3      -0.12740     0.07676  -1.660 0.097155 .
## IMD5f4      -0.32303     0.07676  -4.208 2.71e-05 ***
## IMD5f5      -0.29157     0.07670  -3.801 0.000149 ***
## ---
## Signif. codes:  0 '***' 0.001 '**' 0.01 '*' 0.05 '.' 0.1 ' ' 1
##
## Residual standard error: 0.9934 on 1667 degrees of freedom
## Multiple R-squared:  0.01548,    Adjusted R-squared:  0.01311
## F-statistic: 6.551 on 4 and 1667 DF,  p-value: 3.143e-05

```

```
##
##
## $BMI[[2]]
## Analysis of Variance Table
##
## Response: x
##           Df Sum Sq Mean Sq F value    Pr(>F)
## IMD5f       4   25.86   6.4648   6.5507 3.143e-05 ***
## Residuals 1667 1645.14   0.9869
## ---
## Signif. codes:  0 '***' 0.001 '**' 0.01 '*' 0.05 '.' 0.1 ' ' 1
##
##
## $FIsqrt
## $FIsqrt[[1]]
##
## Call:
## lm(formula = x ~ IMD5f, data = ses_microbiome1)
##
## Residuals:
##      Min       1Q   Median       3Q      Max
## -0.41657 -0.09821 -0.01023  0.09333  0.43027
##
## Coefficients:
##              Estimate Std. Error t value Pr(>|t|)
## (Intercept)  0.4104986  0.0079149  51.864  <2e-16 ***
## IMD5f2       -0.0161334  0.0112185  -1.438    0.151
## IMD5f3        0.0060714  0.0112101   0.542    0.588
## IMD5f4        0.0001363  0.0112101   0.012    0.990
## IMD5f5       -0.0055669  0.0112017  -0.497    0.619
## ---
## Signif. codes:  0 '***' 0.001 '**' 0.01 '*' 0.05 '.' 0.1 ' ' 1
##
## Residual standard error: 0.1451 on 1667 degrees of freedom
## Multiple R-squared:  0.002656,    Adjusted R-squared:  0.0002624
## F-statistic: 1.11 on 4 and 1667 DF,  p-value: 0.3503
##
##
## $FIsqrt[[2]]
## Analysis of Variance Table
##
## Response: x
##           Df Sum Sq Mean Sq F value    Pr(>F)
## IMD5f       4   0.093  0.023357   1.1096 0.3503
## Residuals 1667 35.088 0.021049
```



```
##
##
## $HEI
## $HEI[[1]]
##
## Call:
## lm(formula = x ~ IMD5f, data = ses_microbiome1)
##
## Residuals:
##      Min       1Q   Median       3Q      Max
## -3.7182 -0.6526 -0.0361  0.6771  3.2744
##
## Coefficients:
##              Estimate Std. Error t value Pr(>|t|)
## (Intercept) -0.07978    0.05455  -1.462   0.144
## IMD5f2       0.15587    0.07732   2.016   0.044 *
## IMD5f3       0.06881    0.07726   0.891   0.373
## IMD5f4       0.09214    0.07726   1.193   0.233
## IMD5f5       0.08276    0.07721   1.072   0.284
## ---
## Signif. codes:  0 '***' 0.001 '**' 0.01 '*' 0.05 '.' 0.1 ' ' 1
##
## Residual standard error: 1 on 1667 degrees of freedom
## Multiple R-squared:  0.00249,    Adjusted R-squared:  9.643e-05
## F-statistic:  1.04 on 4 and 1667 DF,  p-value: 0.385
##
##
## $HEI[[2]]
## Analysis of Variance Table
##
## Response: x
##           Df Sum Sq Mean Sq F value Pr(>F)
## IMD5f       4    4.16  1.0402  1.0403  0.385
## Residuals 1667 1666.84  0.9999

chisq.test(ses_microbiome1$IMD5f, ses_microbiome1$Ethnic_Origin)

##
## Pearson's Chi-squared test
##
## data:  ses_microbiome1$IMD5f and ses_microbiome1$Ethnic_Origin
## X-squared = 21.301, df = 20, p-value = 0.3796
```

## Education quantiles vs Covars

```
ses_microbiome2 <- ses_microbiome[complete.cases(ses_microbiome$eduff),]

edu.mods <- apply(ses_microbiome2[c("Age", "BMI", "FIsqrt", "HEI")],2, function(x){
  a<- lm(x ~ eduff, data=ses_microbiome2)
  b<-summary(a)
  c <- anova(a)
  return(list(b,c))
})
```

```
edu.mods
```

```
## $Age
## $Age[[1]]
##
## Call:
## lm(formula = x ~ eduff, data = ses_microbiome2)
##
## Residuals:
##      Min       1Q   Median       3Q      Max
## -3.8739 -0.5356  0.0712  0.6076  2.5933
##
## Coefficients:
##              Estimate Std. Error t value Pr(>|t|)
## (Intercept)   0.62885     0.06067   10.365 < 2e-16 ***
## eduff2        -0.58905     0.07978   -7.384 2.61e-13 ***
## eduff3        -0.69004     0.07441   -9.274 < 2e-16 ***
## eduff4        -1.15598     0.07869  -14.690 < 2e-16 ***
## ---
## Signif. codes:  0 '***' 0.001 '**' 0.01 '*' 0.05 '.' 0.1 ' ' 1
##
## Residual standard error: 0.9496 on 1422 degrees of freedom
## Multiple R-squared:  0.1332, Adjusted R-squared:  0.1314
## F-statistic: 72.87 on 3 and 1422 DF,  p-value: < 2.2e-16
##
##
## $Age[[2]]
## Analysis of Variance Table
##
## Response: x
##              Df Sum Sq Mean Sq F value    Pr(>F)
## eduff          3  197.13   65.710   72.868 < 2.2e-16 ***
## Residuals 1422 1282.30    0.902
```

```

## ---
## Signif. codes:  0 '***' 0.001 '**' 0.01 '*' 0.05 '.' 0.1 ' ' 1
##
##
## $BMI
## $BMI[[1]]
##
## Call:
## lm(formula = x ~ eduff, data = ses_microbiome2)
##
## Residuals:
##      Min       1Q   Median       3Q      Max
## -2.0913 -0.6713 -0.1316  0.5580  4.7000
##
## Coefficients:
##              Estimate Std. Error t value Pr(>|t|)
## (Intercept)  0.26556    0.06167   4.306 1.78e-05 ***
## eduff2       -0.24525    0.08110  -3.024 0.002538 **
## eduff3       -0.28968    0.07564  -3.830 0.000134 ***
## eduff4       -0.47628    0.07999  -5.954 3.29e-09 ***
## ---
## Signif. codes:  0 '***' 0.001 '**' 0.01 '*' 0.05 '.' 0.1 ' ' 1
##
## Residual standard error: 0.9653 on 1422 degrees of freedom
## Multiple R-squared:  0.02464,    Adjusted R-squared:  0.02258
## F-statistic: 11.97 on 3 and 1422 DF,  p-value: 9.614e-08
##
##
## $BMI[[2]]
## Analysis of Variance Table
##
## Response: x
##              Df Sum Sq Mean Sq F value    Pr(>F)
## eduff          3   33.47  11.1574   11.973 9.614e-08 ***
## Residuals 1422 1325.09   0.9318
## ---
## Signif. codes:  0 '***' 0.001 '**' 0.01 '*' 0.05 '.' 0.1 ' ' 1
##
##
## $FIsqrt
## $FIsqrt[[1]]
##
## Call:
## lm(formula = x ~ eduff, data = ses_microbiome2)
##

```

```

## Residuals:
##      Min       1Q   Median       3Q      Max
## -0.41462 -0.09439 -0.00544  0.09051  0.39921
##
## Coefficients:
##              Estimate Std. Error t value Pr(>|t|)
## (Intercept)  0.469937   0.008978  52.346 < 2e-16 ***
## eduff2       -0.051240   0.011805  -4.340 1.52e-05 ***
## eduff3       -0.055316   0.011010  -5.024 5.70e-07 ***
## eduff4       -0.068847   0.011645  -5.912 4.22e-09 ***
## ---
## Signif. codes:  0 '***' 0.001 '**' 0.01 '*' 0.05 '.' 0.1 ' ' 1
##
## Residual standard error: 0.1405 on 1422 degrees of freedom
## Multiple R-squared:  0.02601,    Adjusted R-squared:  0.02396
## F-statistic: 12.66 on 3 and 1422 DF,  p-value: 3.616e-08
##
##
## $FIsqrt[[2]]
## Analysis of Variance Table
##
## Response: x
##              Df Sum Sq Mean Sq F value    Pr(>F)
## eduff          3  0.7499  0.249983    12.66 3.616e-08 ***
## Residuals 1422 28.0787  0.019746
## ---
## Signif. codes:  0 '***' 0.001 '**' 0.01 '*' 0.05 '.' 0.1 ' ' 1
##
##
## $HEI
## $HEI[[1]]
##
## Call:
## lm(formula = x ~ eduff, data = ses_microbiome2)
##
## Residuals:
##      Min       1Q   Median       3Q      Max
## -3.5880 -0.6778 -0.0321  0.6672  3.3047
##
## Coefficients:
##              Estimate Std. Error t value Pr(>|t|)
## (Intercept) -0.14115   0.06337  -2.227  0.02609 *
## eduff2       0.14640   0.08334   1.757  0.07917 .
## eduff3       0.14011   0.07772   1.803  0.07164 .
## eduff4       0.23744   0.08220   2.888  0.00393 **

```

```
## ---
## Signif. codes:  0 '***' 0.001 '**' 0.01 '*' 0.05 '.' 0.1 ' ' 1
##
## Residual standard error: 0.992 on 1422 degrees of freedom
## Multiple R-squared:  0.005839,    Adjusted R-squared:  0.003742
## F-statistic: 2.784 on 3 and 1422 DF,  p-value: 0.03965
##
##
## $HEI[[2]]
## Analysis of Variance Table
##
## Response: x
##           Df Sum Sq Mean Sq F value    Pr(>F)
## eduff       3      8.22  2.73945     2.784 0.03965 *
## Residuals 1422 1399.24  0.98399
## ---
## Signif. codes:  0 '***' 0.001 '**' 0.01 '*' 0.05 '.' 0.1 ' ' 1
chisq.test(ses_microbiome2$eduff, ses_microbiome2$Ethnic_Origin)

##
## Pearson's Chi-squared test
##
## data:  ses_microbiome2$eduff and ses_microbiome2$Ethnic_Origin
## X-squared = 20.935, df = 15, p-value = 0.1389
```

## Income quantiles vs Covars

```
ses_microbiome3 <- ses_microbiome[complete.cases(ses_microbiome$Income4F),]

inc.mods <- apply(ses_microbiome3[c("Age", "BMI", "FIsqrt", "HEI")],2, function(x){
  a<- lm(x ~ Income4F, data=ses_microbiome3)
  b<-summary(a)
  c <- anova(a)
  return(list(b,c))
})

inc.mods

## $Age
## $Age[[1]]
##
## Call:
## lm(formula = x ~ Income4F, data = ses_microbiome3)
```

```
##
## Residuals:
##      Min       1Q   Median       3Q      Max
## -2.79062 -0.43486  0.04196  0.52629  2.18750
##
## Coefficients:
##              Estimate Std. Error t value Pr(>|t|)
## (Intercept)  0.47628    0.07119   6.690 4.20e-11 ***
## Income4F2    -0.23244    0.09240  -2.516  0.0121 *
## Income4F3    -0.45619    0.08567  -5.325 1.32e-07 ***
## Income4F4    -0.59764    0.09930  -6.019 2.68e-09 ***
## ---
## Signif. codes:  0 '***' 0.001 '**' 0.01 '*' 0.05 '.' 0.1 ' ' 1
##
## Residual standard error: 0.8393 on 795 degrees of freedom
## Multiple R-squared:  0.05458,    Adjusted R-squared:  0.05101
## F-statistic: 15.3 on 3 and 795 DF,  p-value: 1.099e-09
##
##
## $Age[[2]]
## Analysis of Variance Table
##
## Response: x
##              Df Sum Sq Mean Sq F value    Pr(>F)
## Income4F      3  32.33 10.7770  15.299 1.099e-09 ***
## Residuals    795 560.02  0.7044
## ---
## Signif. codes:  0 '***' 0.001 '**' 0.01 '*' 0.05 '.' 0.1 ' ' 1
##
##
## $BMI
## $BMI[[1]]
##
## Call:
## lm(formula = x ~ Income4F, data = ses_microbiome3)
##
## Residuals:
##      Min       1Q   Median       3Q      Max
## -2.0888 -0.6781 -0.1760  0.5687  4.1513
##
## Coefficients:
##              Estimate Std. Error t value Pr(>|t|)
## (Intercept)  0.09606    0.08121   1.183   0.237
## Income4F2    -0.01272    0.10540  -0.121   0.904
## Income4F3    -0.07826    0.09773  -0.801   0.424
```

```

## Income4F4    -0.29234    0.11327   -2.581    0.010 *
## ---
## Signif. codes:  0 '***' 0.001 '**' 0.01 '*' 0.05 '.' 0.1 ' ' 1
##
## Residual standard error: 0.9574 on 795 degrees of freedom
## Multiple R-squared:  0.01139,    Adjusted R-squared:  0.007657
## F-statistic: 3.053 on 3 and 795 DF,  p-value: 0.02785
##
##
## $BMI[[2]]
## Analysis of Variance Table
##
## Response: x
##           Df Sum Sq Mean Sq F value   Pr(>F)
## Income4F    3   8.39  2.79808   3.0525 0.02785 *
## Residuals 795 728.73  0.91664
## ---
## Signif. codes:  0 '***' 0.001 '**' 0.01 '*' 0.05 '.' 0.1 ' ' 1
##
##
## $FIsqrt
## $FIsqrt[[1]]
##
## Call:
## lm(formula = x ~ Income4F, data = ses_microbiome3)
##
## Residuals:
##      Min       1Q   Median       3Q      Max
## -0.43123 -0.09664 -0.00825  0.09635  0.39132
##
## Coefficients:
##              Estimate Std. Error t value Pr(>|t|)
## (Intercept)  0.46285    0.01222  37.869  < 2e-16 ***
## Income4F2   -0.03162    0.01586  -1.993   0.0466 *
## Income4F3   -0.03627    0.01471  -2.466   0.0139 *
## Income4F4   -0.08431    0.01705  -4.945 9.28e-07 ***
## ---
## Signif. codes:  0 '***' 0.001 '**' 0.01 '*' 0.05 '.' 0.1 ' ' 1
##
## Residual standard error: 0.1441 on 795 degrees of freedom
## Multiple R-squared:  0.03082,    Adjusted R-squared:  0.02717
## F-statistic: 8.428 on 3 and 795 DF,  p-value: 1.616e-05
##
##
## $FIsqrt[[2]]

```

```

## Analysis of Variance Table
##
## Response: x
##           Df Sum Sq Mean Sq F value    Pr(>F)
## Income4F    3  0.525  0.175005   8.4279 1.616e-05 ***
## Residuals 795 16.508  0.020765
## ---
## Signif. codes:  0 '***' 0.001 '**' 0.01 '*' 0.05 '.' 0.1 ' ' 1
##
##
## $HEI
## $HEI[[1]]
##
## Call:
## lm(formula = x ~ Income4F, data = ses_microbiome3)
##
## Residuals:
##      Min       1Q   Median       3Q      Max
## -2.6959 -0.6767  0.0013  0.6363  3.3130
##
## Coefficients:
##              Estimate Std. Error t value Pr(>|t|)
## (Intercept) -0.14952    0.08078  -1.851   0.0645 .
## Income4F2     0.07115    0.10485   0.679   0.4976
## Income4F3     0.11513    0.09722   1.184   0.2366
## Income4F4     0.28767    0.11267   2.553   0.0109 *
## ---
## Signif. codes:  0 '***' 0.001 '**' 0.01 '*' 0.05 '.' 0.1 ' ' 1
##
## Residual standard error: 0.9524 on 795 degrees of freedom
## Multiple R-squared:  0.009085,    Adjusted R-squared:  0.005346
## F-statistic:  2.43 on 3 and 795 DF,  p-value: 0.06405
##
##
## $HEI[[2]]
## Analysis of Variance Table
##
## Response: x
##           Df Sum Sq Mean Sq F value    Pr(>F)
## Income4F    3   6.61  2.20368   2.4296 0.06405 .
## Residuals 795 721.08  0.90703
## ---
## Signif. codes:  0 '***' 0.001 '**' 0.01 '*' 0.05 '.' 0.1 ' ' 1

```



```
chisq.test(ses_microbiome3$Income4F, ses_microbiome3$Income4F)

##
##  Pearson's Chi-squared test
##
## data:  ses_microbiome3$Income4F and ses_microbiome3$Income4F
## X-squared = 2397, df = 9, p-value < 2.2e-16
```
